# Supplementary material for: Effect of alcohol addition on the structure and corrosion resistance of plasma electrolytic oxidation films formed on AZ31B magnesium alloy
Source: Royal Society of Chemistry journal article supplement (doi:10.1039/d0ra01154a), 2020-01-01
Supplement: d0ra01154a1.pdf [file d0ra01154a1.pdf]

## Supporting Information

### **Effect of alcohol addition on the structure and corrosion resistance of plasma electrolytic oxidation films formed on AZ31B magnesium alloy**

Hidetaka Asoh\*, Kento Asakura, and Hideki Hashimoto

*Department of Applied Chemistry, Kogakuin University,*

*2665-1 Nakano, Hachioji, Tokyo 192-0015, Japan*

\*Corresponding author. E-mail address: asoh@cc.kogakuin.ac.jp (H. Asoh).

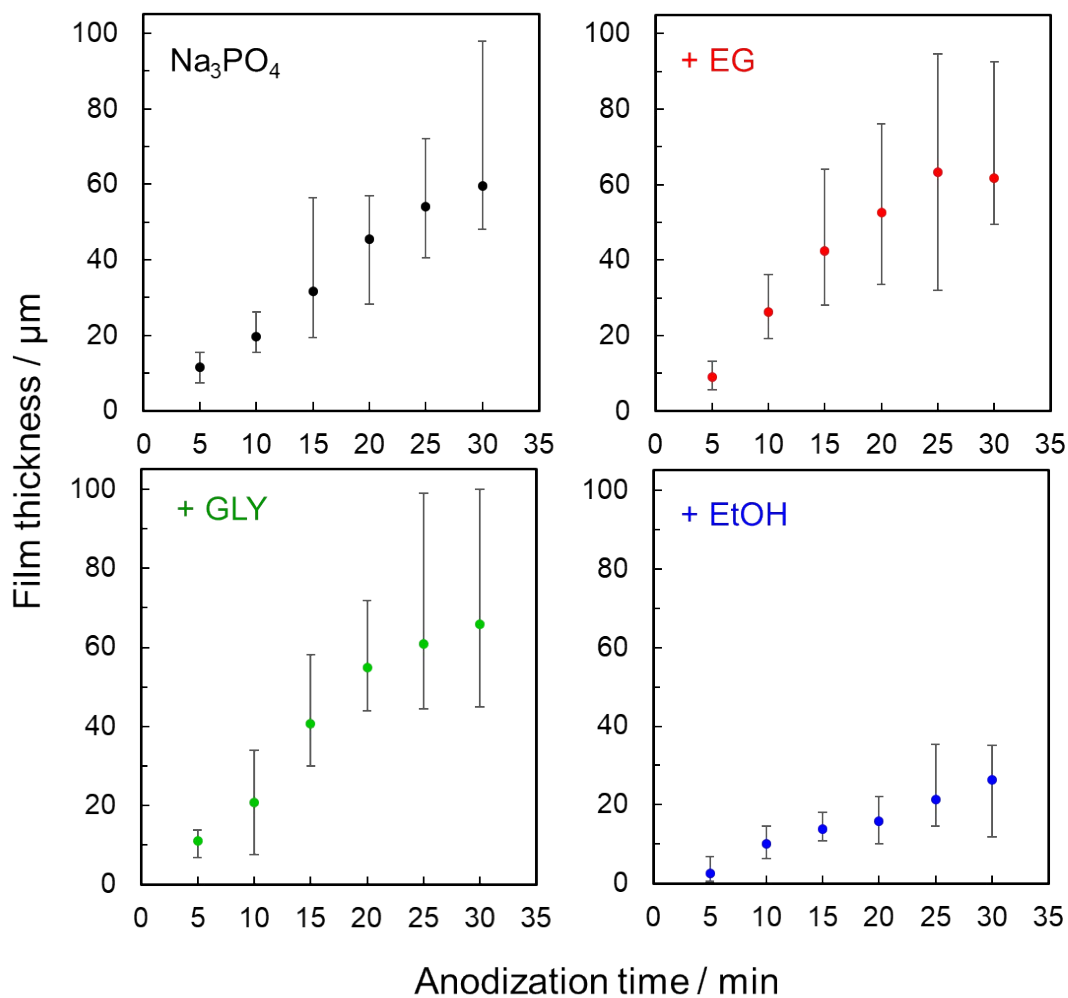

**Figure S1** Thickness of the resulting PEO film as a function of anodization time. Anodization conditions were the same as those in Fig. 1(b). The thickness of the anodic films was measured using an eddy-current coating-thickness tester (Kett Electric Laboratory LH-373). The average value of 20 point measurements was used.

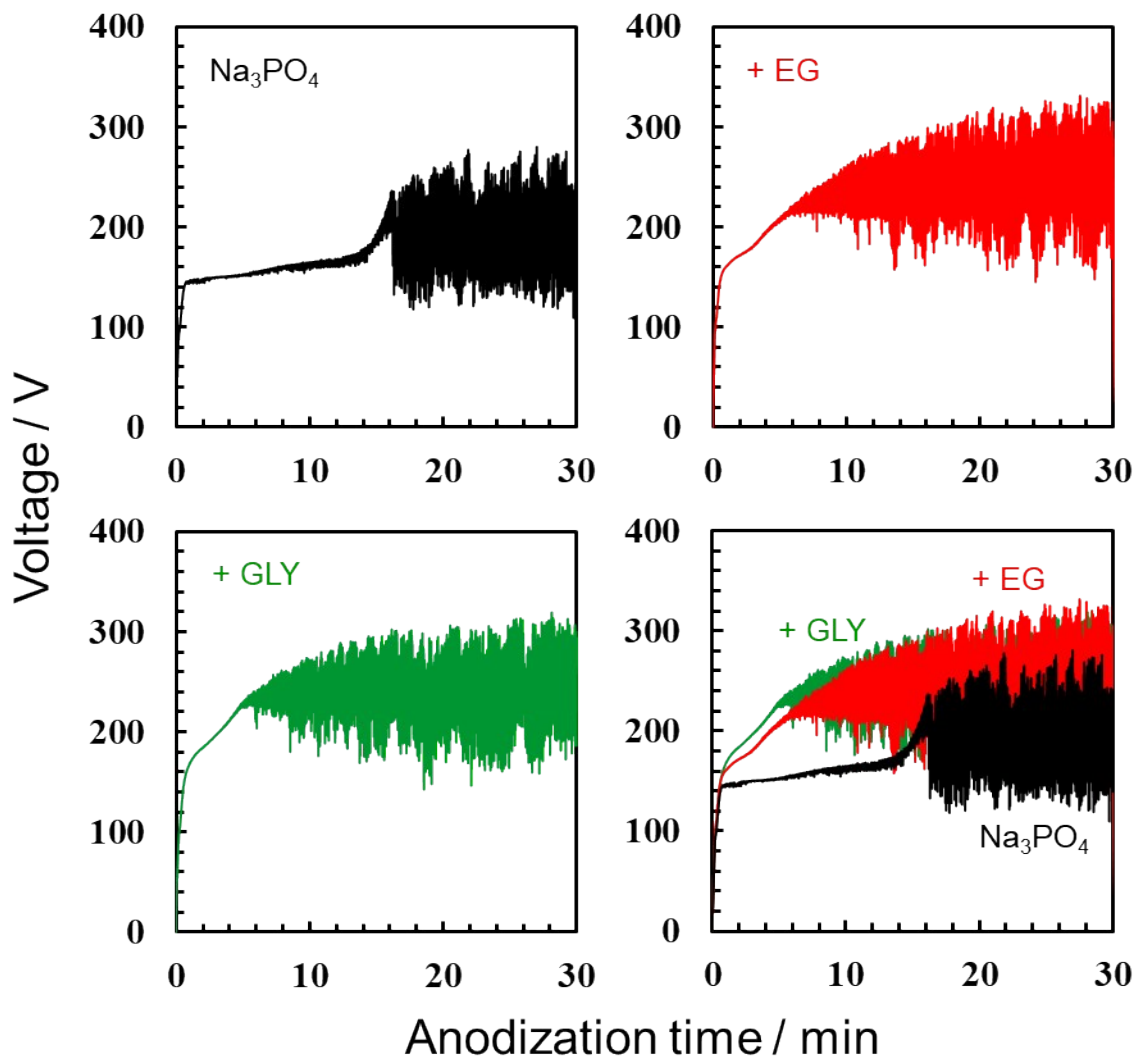

**Figure S2** Voltage–time curves for the anodization of AZ31B magnesium alloy in 0.5 mol·dm<sup>-3</sup> Na<sub>3</sub>PO<sub>4</sub> with 5 vol.% various alcohols under a constant current density of 200 A·m<sup>-2</sup> at 25 °C.

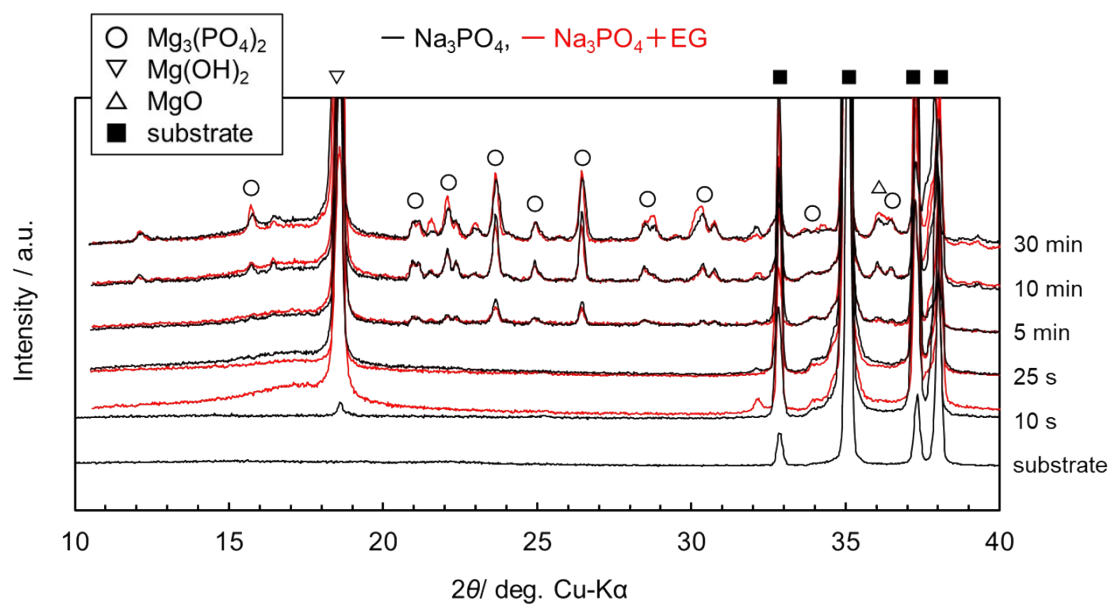

**Figure S3** XRD patterns for the specimens after PEO treatment in  $0.5 \text{ mol}\cdot\text{dm}^{-3} \text{ Na}_3\text{PO}_4$  with 5 vol.% EG addition under a constant current density of  $200 \text{ A}\cdot\text{m}^{-2}$  at  $25 \text{ }^\circ\text{C}$  for different anodization times.
